# Supplementary material for: In situ measurements of thermal diffusivity in sediments of the methane-rich zone of Cascadia Margin, NE Pacific Ocean
Source: Oxford University Press journal article supplement (doi:10.12952/journal.elementa.000039), 2015-01-01
Supplement: elementa_000039_s002.docx [file elementa_000039_s002.docx]

**Table S1.** Calibration offsets for temperature sensors.

| Sensor ID | Depth and Location on Probe (cm) | Temperature Offset (˚C) |
| --- | --- | --- |
| 8061 | +5 (bottom water) | -0.051 |
| 8062 | -5 (sediment) | -0.051 |
| 8063 | -10 (sediment) | -0.079 |
| 8064 | -15 (sediment) | 0.032 |
